# Supplementary material
Source: MDPI journal article supplement (https://www.mdpi.com/2079-6412/12/8/1210)
Supplement: s1 [file s1 › coatings-1846322-supplementary.pdf]

# Supplementary Materials: Realizing Efficient Photoelectrochemical Performance for Well-Designed CdS@ZnIn<sub>2</sub>S<sub>4</sub> Heterostructure Photoanode with Directional Interfacial Charge Transfer Dynamics

Xianchen Wu <sup>1</sup>, Yu Qian <sup>1</sup>, Gangyang Lv <sup>1</sup>, Liyuan Long <sup>1,\*</sup>, Yong Zhou <sup>2,\*</sup> and Dunhui Wang <sup>1,\*</sup>

<sup>1</sup> Micro-Electronics Research Institute and School of Electronics and Information, Hangzhou Dianzi University, Hangzhou 310018, China

<sup>2</sup> National Laboratory of Solid State Microstructures and Department of Physics, Nanjing University, Nanjing 210093, China

\* Correspondence: liyuan-long@hdu.edu.cn (L.L.); zhoyong1999@nju.edu.cn (Y.Z.); wangdh@hdu.edu.cn (D.W.)

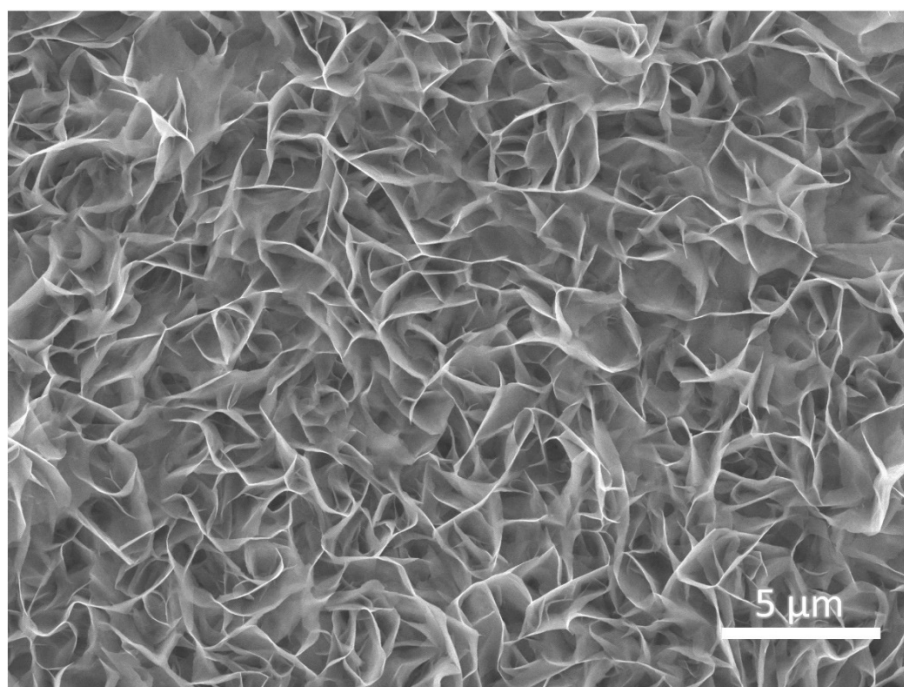

**Figure S1.** The FESEM images of CdS@ZIS (HC).

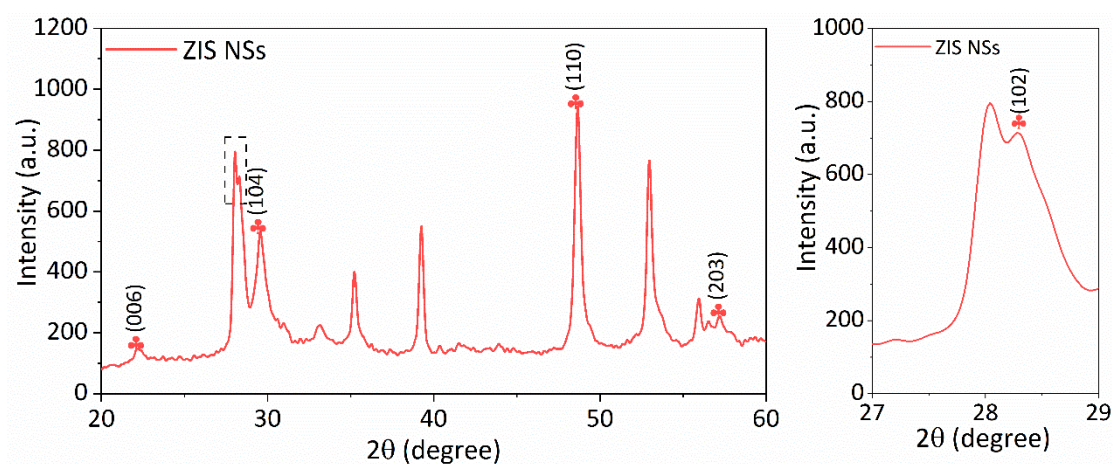

Figure S2. XRD patterns of ZIS (HC).

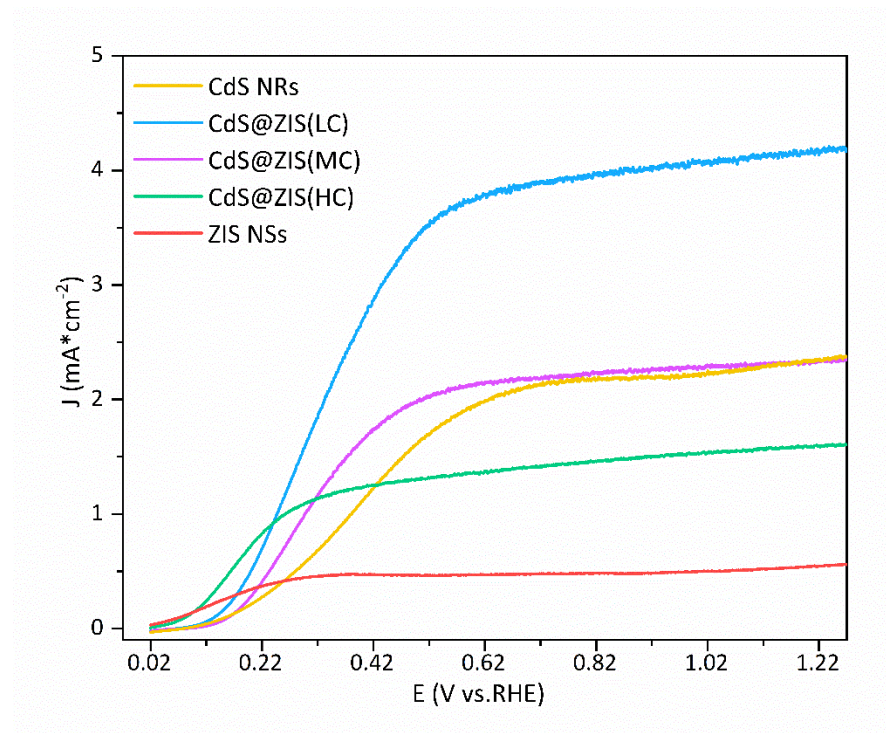

Figure S3. Photocurrent density versus potential curves of CdS NRs, ZIS NSs and CdS@ZIS with varied concentration of ZIS precursor.

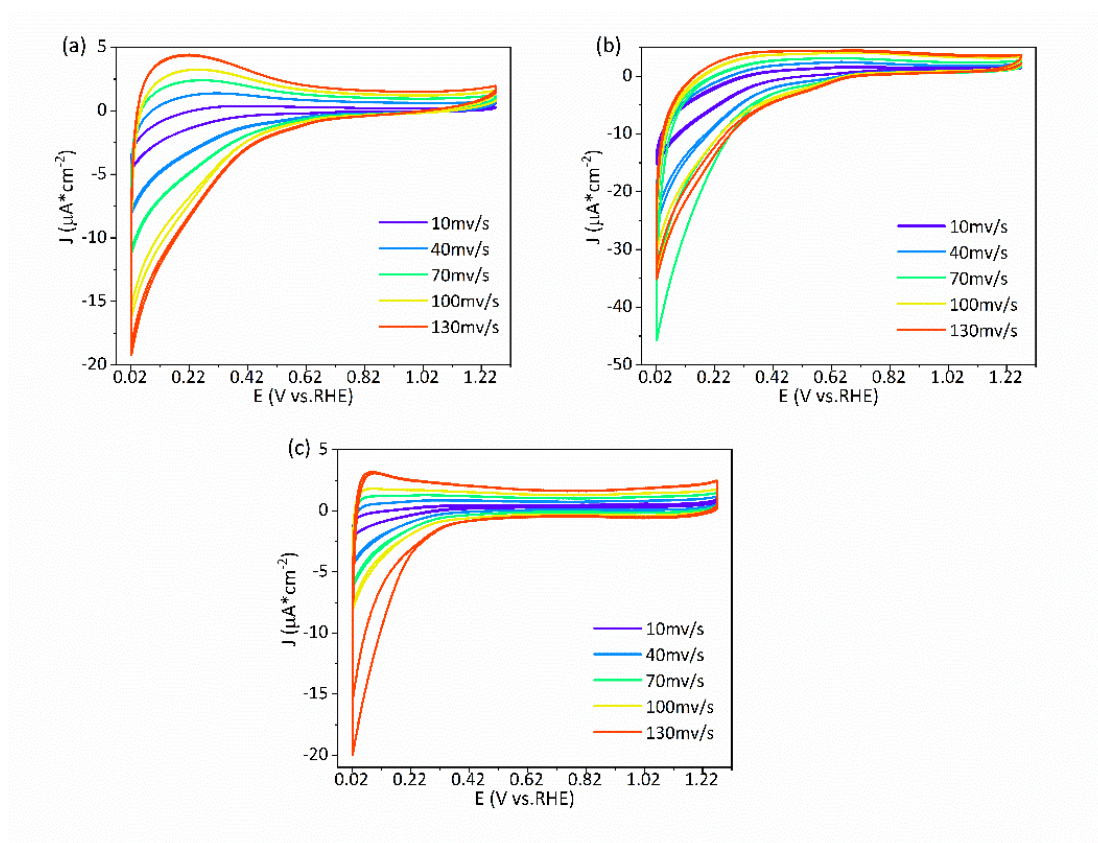

**Figure S4.** Cyclic voltammograms of (a) CdS NRs, (b) ZIS NSs and (c) CdS@ZIS(LC) at various scan rates from 10 to 130 mV/s.

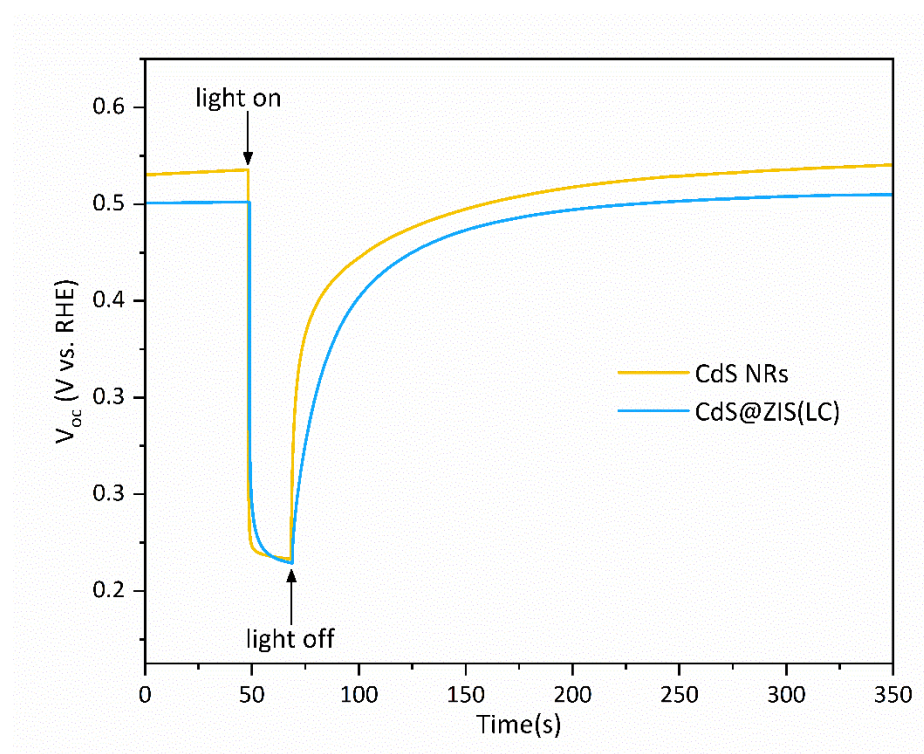

**Figure S5.** Transient open circuit potential plots under simulated solar light-switching.
